# Supplementary material for: Small Gold Nanorods with Tunable Absorption for Photothermal Microscopy in Cells
Source: PubMed Central journal article supplement (PMC5323823; doi:10.1002/advs.201600280), 2016-11-19
Supplement: ADVS-4-na-s001.pdf [file ADVS-4-na-s001.pdf]

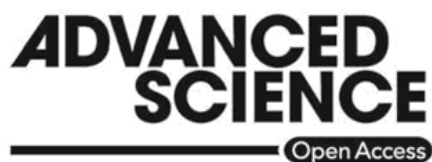

## Supporting Information

for *Adv. Sci.*, DOI: 10.1002/advs.201600280

Small Gold Nanorods with Tunable Absorption for  
Photothermal Microscopy in Cells

*Edakkattuparambil Sidharth Shibu, Nadezda Varkentina,  
Laurent Cognet, and Brahim Lounis\**

## Supporting Information

## Gold nanorods with tunable absorption for photothermal microscopy in cells

*Edakkattuparambil Sidharth Shibu<sup>1,2</sup>, Nadezda Varkentina<sup>1,2</sup>, Laurent Cognet<sup>1,2</sup> and Brahim Lounis<sup>1,2,\*</sup>*

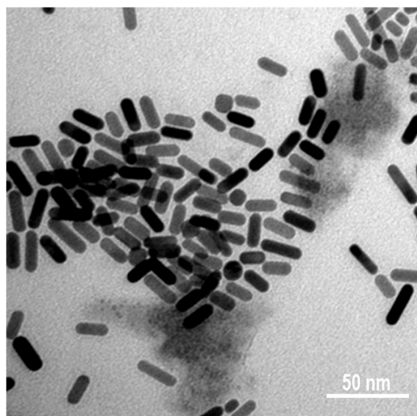

**Figure S1.** TEM image of nanorods collected from a fraction of rods having a larger aspect ratio than in Figure 2.

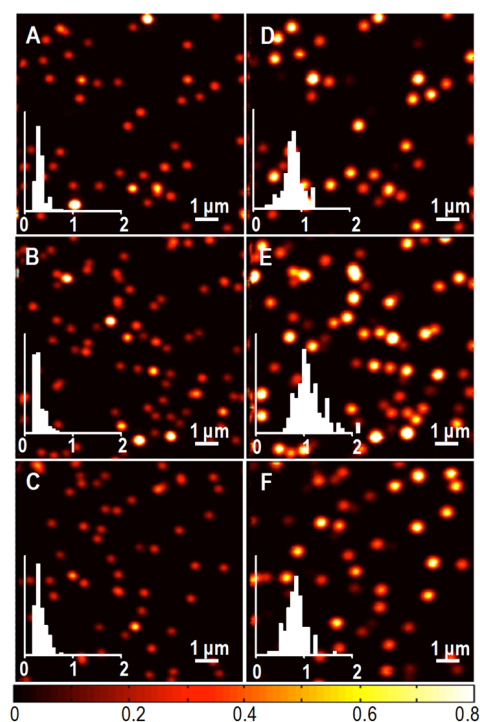

**Figure S2.** PhI images of nanorods from fractions with different aspect ratio (peak SPR at 634 nm, 648 nm and 655 nm respectively) excited with beams at 532 nm (A-C) and 640 nm

(D-F). Insets: Corresponding PhI signal histograms constructed from more than 100 single nanorods.

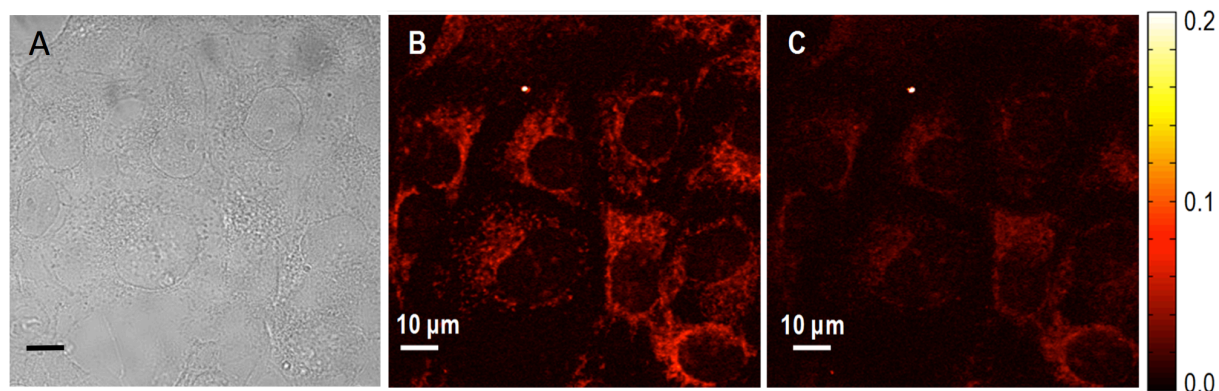

**Figure S3.** (A) White light and (B and C) PhI of COS 7 cells under (B) 532 nm and (C) 640 nm excitations. PhI under 532 nm excitation shows larger mitochondrial absorption compared to 640 nm excitation.

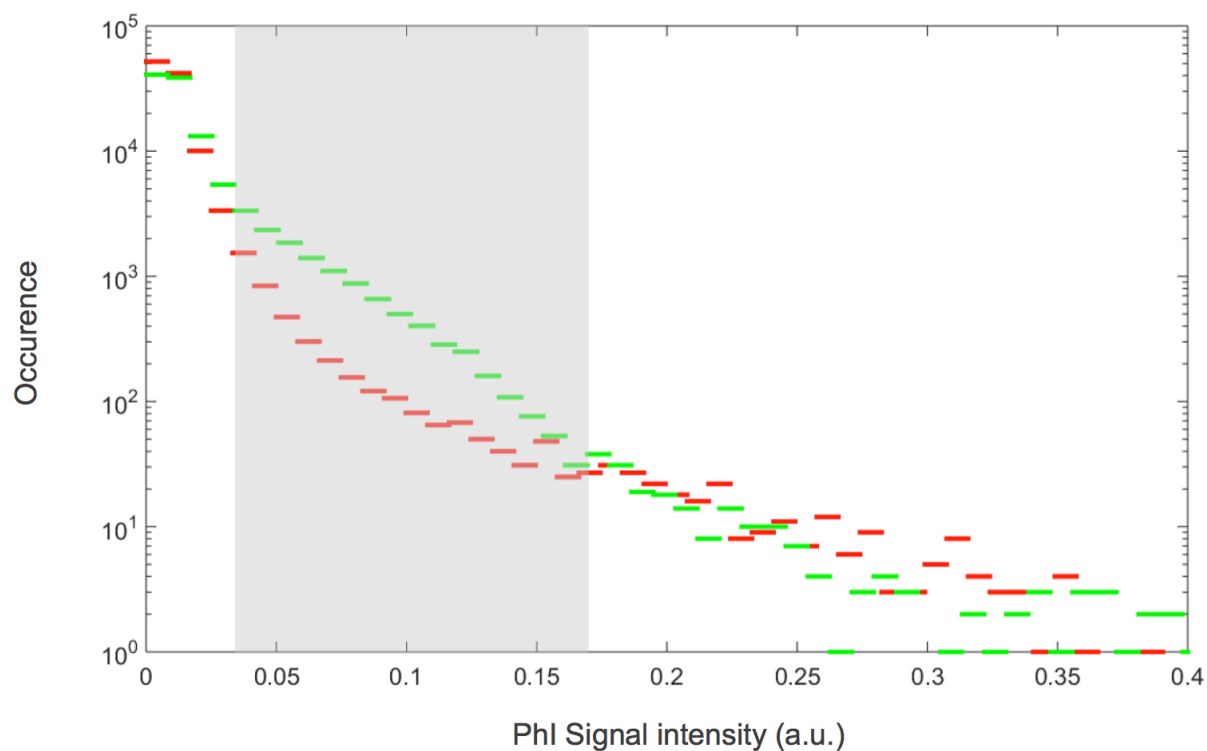

**Figure S4.** Histograms of PhI signals of images displayed in Figure 4: Green COS 7 cells are excited with 532 nm laser, Red excitation at 640 nm. Clearly, PhI under 532 nm excitation shows larger mitochondrial signals (gray area) compared to 640 nm excitation.
